# Supplementary material
Source: Springer Nature journal article supplement (https://www.springermedizin.de/resource/supplementary/12889_2011_3212_MOESM1_ESM.pdf/9488286)

## U.S. veterans

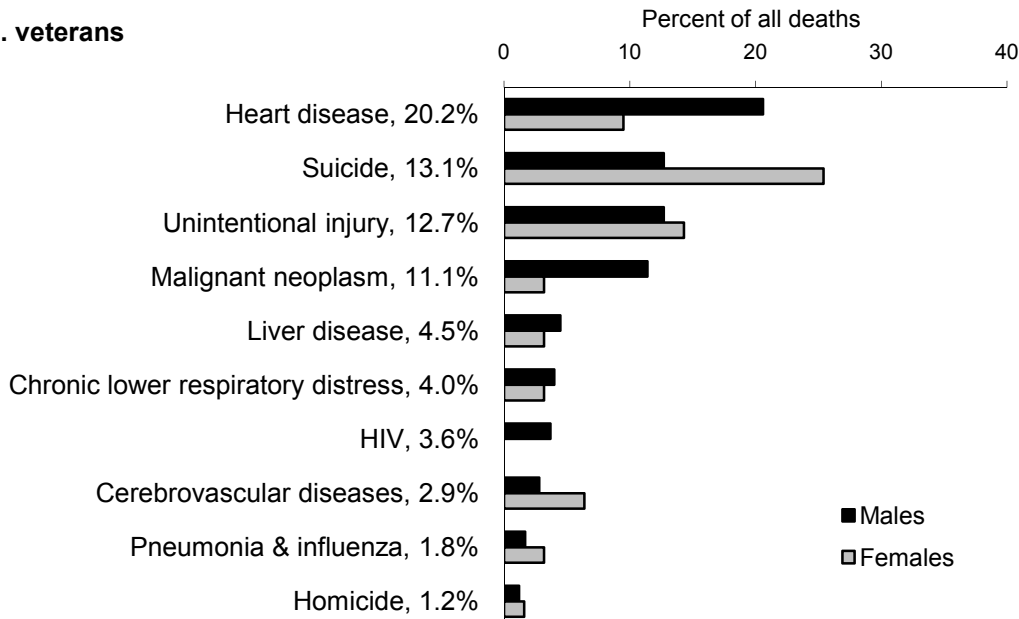

## U.S. adult population

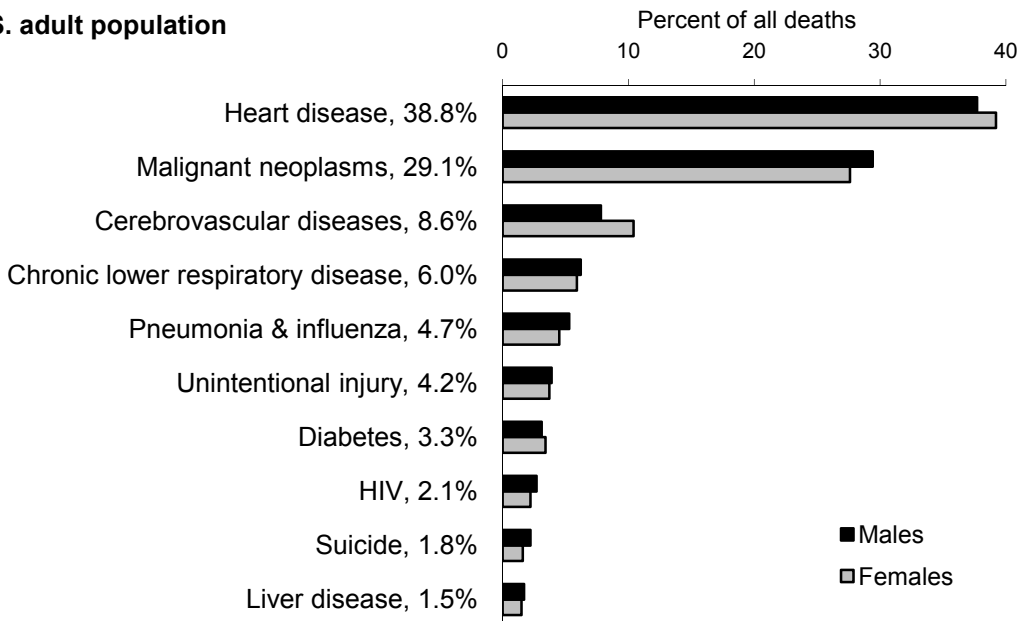

Supplement: MOESM1 [file 9488286]
